# Supplementary material
Source: PubMed Central journal article supplement (PMC7903797)
Supplement: 13054_2021_3502_MOESM1_ESM.pdf [file 13054_2021_3502_MOESM1_ESM.pdf]

## **Additional File 1**

### **Helmet CPAP to treat hypoxic pneumonia outside the ICU: an observational study during the COVID-19 outbreak**

Andrea Coppadoro<sup>1</sup> M.D., Annalisa Benini<sup>1</sup> M.D., Robert Fruscio<sup>1,2</sup> M.D., Luisa Verga<sup>1</sup> M.D., Paolo Mazzola<sup>1,2</sup> M.D., Giuseppe Bellelli<sup>1,2</sup> M.D., Marco Carbone<sup>1,2</sup> M.D., Giacomo Mulinacci<sup>1,2</sup> M.D., Alessandro Soria<sup>1</sup> M.D., Beatrice Noè<sup>1,2</sup> M.D., Eduardo Beck<sup>3</sup> M.D., Riccardo Di Sciacca<sup>1</sup> M.D., Davide Ippolito<sup>1</sup> M.D., Giuseppe Citerio<sup>1,2</sup> M.D., Maria Grazia Valsecchi<sup>2</sup>, Andrea Biondi<sup>1,2</sup> M.D., Alberto Pesci<sup>1,2</sup> M.D., Paolo Bonfanti<sup>1,2</sup> M.D., Davide Gaudesi<sup>2</sup>, PhD, Giacomo Bellani<sup>1,2\*</sup> M.D. Ph.D., Giuseppe Foti<sup>1,2</sup> M.D.\*

\* These authors contributed equally to the manuscript

<sup>1</sup>ASST Monza, San Gerardo Hospital, Monza, Italy

<sup>2</sup>Department of Medicine and Surgery, University of Milan-Bicocca, Monza, Italy

<sup>3</sup>ASST Monza, Desio Hospital, Desio, Italy

### **Corresponding Author**

Giacomo Bellani, MD, PhD

University of Milan-Bicocca, Department of Medicine and Surgery

Via Cadore 48, Monza (MB), Italy

[giacomo.bellani1@unimib.it](mailto:giacomo.bellani1@unimib.it)

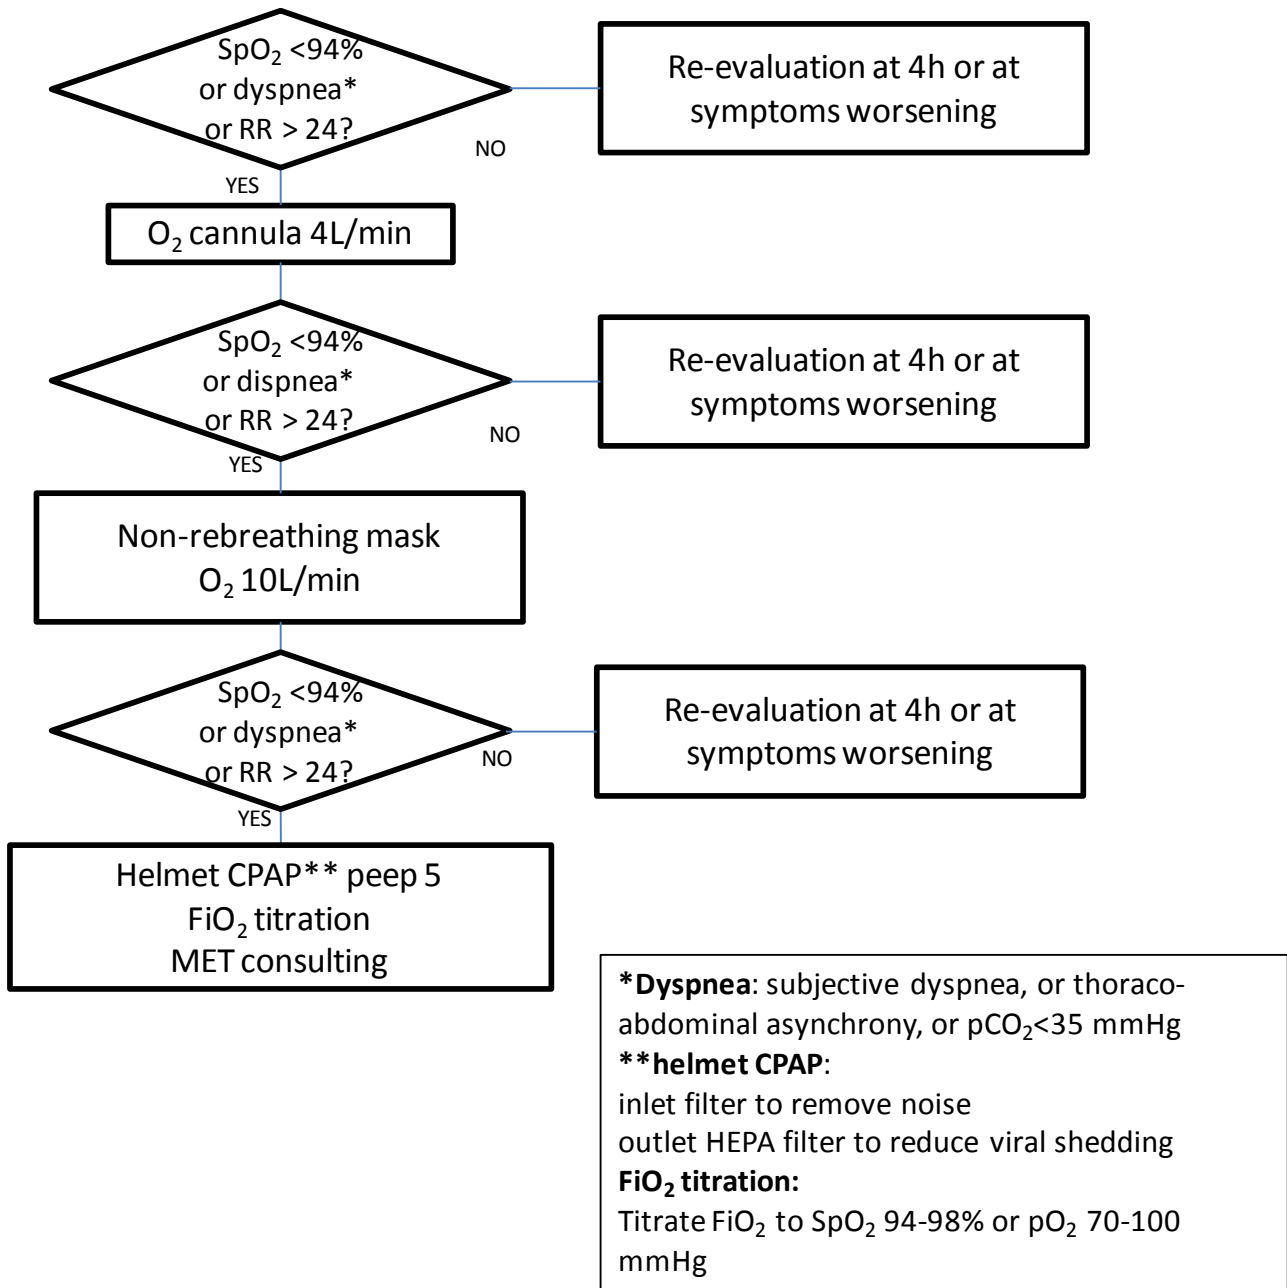

**e-Figure 1. Simplified protocol for helmet CPAP therapy start.** RR respiratory rate; MET medical emergency team; HEPA high efficiency particulate air

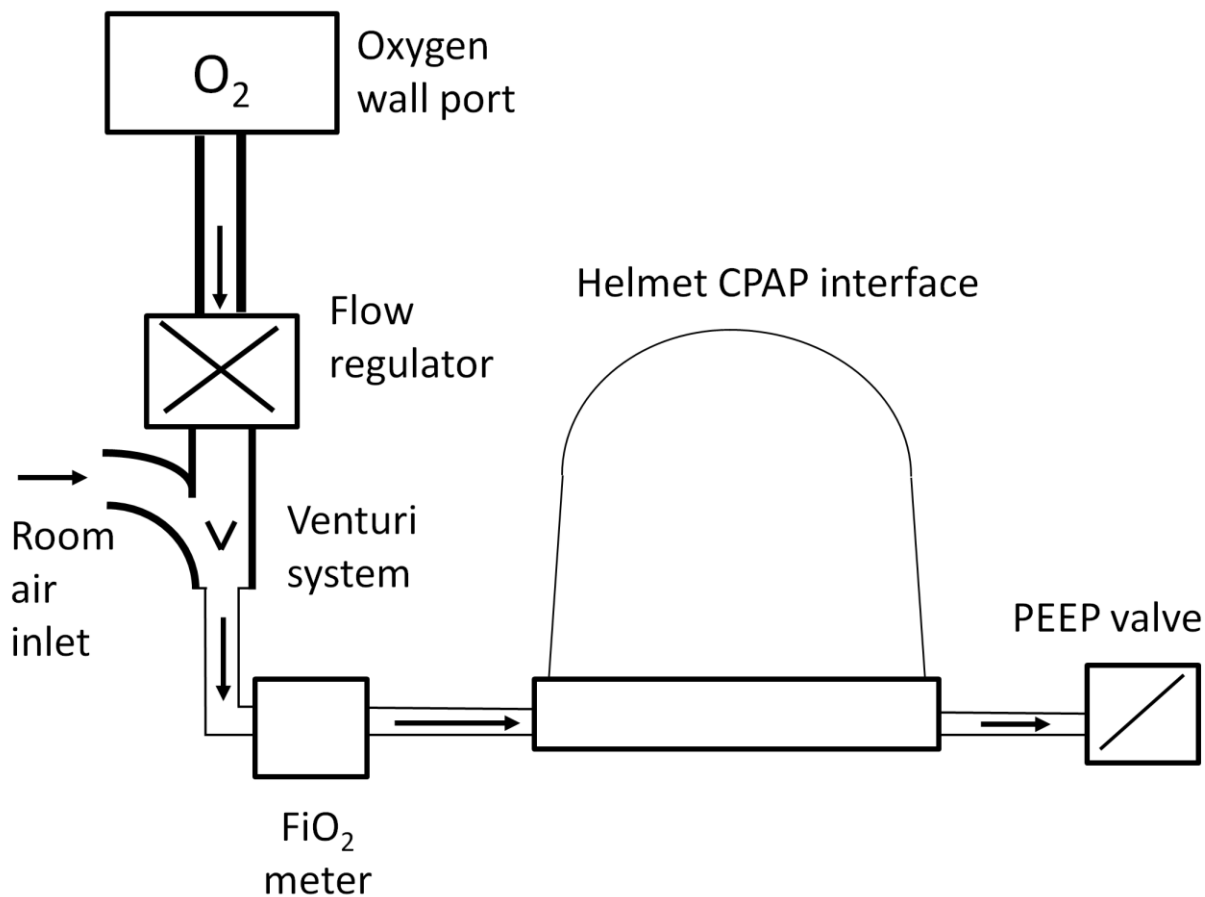

**e-Figure 2. Scheme of helmet CPAP free flow circuit.** Helmet CPAP is inflated by a gas mixture of medical Oxygen and room air generated by a Venturi system. Gas flow was usually set at 60-90L/min, based on patient distress, and  $FiO_2$  was adjusted based on patient oxygen saturation (measured either by arterial blood gas or peripheral saturation). Pressure within the helmet was maintained constant (5-10  $cmH_2O$ ) by a PEEP valve placed on the helmet gas outlet. Placing a HEPA filter before PEEP valve (not shown in figure) is suggested to prevent viral shedding; to reduce noise within the helmet, HME filters (not shown) might be connected to the Venturi system and smooth (internal surface) tubing are recommended.

**e-Table1. Number of missing data by study variable**

| Variable               | Missing | Variable                                                   | Missing |
|------------------------|---------|------------------------------------------------------------|---------|
| Age                    | 0       | PaO <sub>2</sub> /FiO <sub>2</sub> Standard O <sub>2</sub> | 34      |
| Sex                    | 0       | O <sub>2</sub> sat Standard O <sub>2</sub>                 | 53      |
| Body mass index        | 191     | PaCO <sub>2</sub> Standard O <sub>2</sub>                  | 33      |
| Comorbidities, N       | 0       | Respiratory rate St.O <sub>2</sub>                         | 167     |
| Clinical Frailty Scale | 120     | PaO <sub>2</sub> /FiO <sub>2</sub> CPAP                    | 17      |
| Symptoms to Hosp. time | 6       | O <sub>2</sub> sat CPAP                                    | 29      |
| Admission to CPAP time | 1       | PaCO <sub>2</sub> CPAP                                     | 13      |
| DNI                    | 0       | Respiratory rate CPAP                                      | 211     |
| White blood cells      | 21      | PEEP CPAP                                                  | 7       |
| Platelets              | 26      | FiO <sub>2</sub> CPAP                                      | 6       |
| C-Reactive protein     | 21      | ARDS                                                       | 54      |
| Procalcitonin          | 163     | CPAP days                                                  | 2       |
| Lactate Dehydrogenase  | 103     | Pronation                                                  | 55      |
| Creatinine             | 19      | Body temperature                                           | 25      |
| Urea                   | 56      | Pre/post CPAP ABG time delay                               | 62      |

**e-Table2. First step of the backward multivariate analysis of independent predictors of helmet****CPAP failure**

| Factor <sup>a</sup>                                                       | <i>P</i> value | Odds Ratio [95% C.I.] |
|---------------------------------------------------------------------------|----------------|-----------------------|
| PaCO <sub>2</sub> (standard oxygen), mmHg                                 | 0.405          | 0.963 [0.881-1.053]   |
| PaCO <sub>2</sub> (CPAP), mmHg                                            | 0.611          | 1.025 [0.932-1.126]   |
| Body temperature, C <sup>o</sup>                                          | 0.476          | 1.136 [0.800-1.615]   |
| PaO <sub>2</sub> /FiO <sub>2</sub> ratio (standard O <sub>2</sub> ), mmHg | 0.313          | 0.997 [0.992-1.003]   |
| Sex                                                                       | 0.385          | 0.696 [0.307-1.578]   |
| CRP, mg/L                                                                 | 0.001          | 1.006 [1.003-1.010]   |
| Hospital admission to oxygen therapy failure, days                        | 0.006          | 0.791 [0.669-0.935]   |
| Age, years                                                                | 0.004          | 1.050 [1.016-1.085]   |
| PaO <sub>2</sub> /FiO <sub>2</sub> ratio (CPAP), mmHg                     | 0.007          | 0.995 [0.991-0.999]   |
| Comorbidities, n.                                                         | 0.008          | 1.567 [1.127-2.179]   |

A p value of 0.05 was chosen as cut-off for factor removal.

**e-Table3. Multivariate analysis of independent predictors of helmet CPAP failure**

| <b>Factor<sup>a</sup></b>                                                 | <b><i>P</i> value</b> | <b>Odds Ratio [95% C.I.]</b> |
|---------------------------------------------------------------------------|-----------------------|------------------------------|
| CRP, mg/L                                                                 | 0.001                 | 1.006 [1.003-1.010]          |
| Hospital admission to oxygen therapy failure, days                        | 0.001                 | 0.767 [0.653-0.900]          |
| Age, years                                                                | 0.002                 | 1.053 [1.019-1.088]          |
| PaO <sub>2</sub> /FiO <sub>2</sub> ratio (standard O <sub>2</sub> ), mmHg | 0.007                 | 0.993 [0.987-0.998]          |
| PaO <sub>2</sub> /FiO <sub>2</sub> ratio increase by CPAP, mmHg           | 0.008                 | 0.995 [0.991-0.999]          |
| Comorbidities, n.                                                         | 0.009                 | 1.544 [1.115-2.137]          |

<sup>a</sup> factors entered in the backward regression model and removed due to lack of statistical significance ( $P > 0.05$ ): sex, body temperature, PaO<sub>2</sub>/FiO<sub>2</sub> ratio and PaCO<sub>2</sub> during standard oxygen treatment, PaCO<sub>2</sub> measured during CPAP
